# Supplementary material for: Enhanced electrocaloric strength of P(VDF-TrFE-CFE) induced by edge-on lamellae
Source: Royal Society of Chemistry journal article supplement (doi:10.1039/c9tc00239a), 2019-01-01
Supplement: c9tc00239a1.pdf [file c9tc00239a1.pdf]

Supplementary Information for

Enhanced Electrocaloric Strength of P(VDF-TrFE-CFE) Induced by

Edge-on Lamellae

Jianfeng Qian<sup>1</sup>, Mengfan Guo<sup>1</sup>, Jianyong Jiang<sup>1</sup>, Zhenkang Dan<sup>1</sup>, Yang Shen<sup>1\*</sup>

<sup>1</sup> School of Materials Science and Engineering, and State Key Lab of New Ceramics and Fine Processing, Tsinghua University, Beijing 100084, China. E-mail: [shyang\\_mse@tsinghua.edu.cn](mailto:shyang_mse@tsinghua.edu.cn)

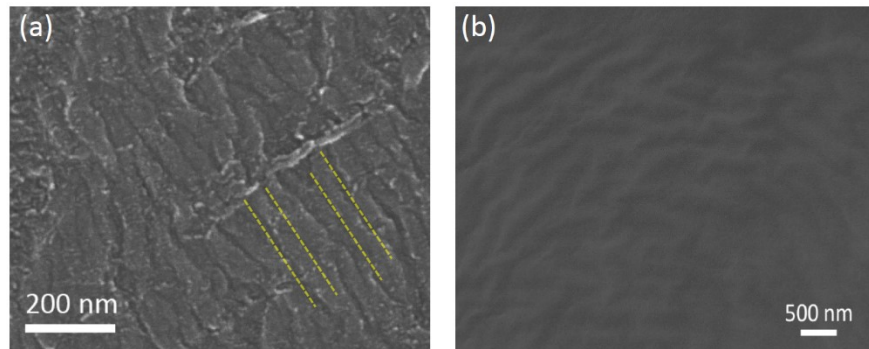

Figure S1. Surface SEM pictures of (a) treated terpolymer with edge-on lamellae; (b) pristine terpolymer.

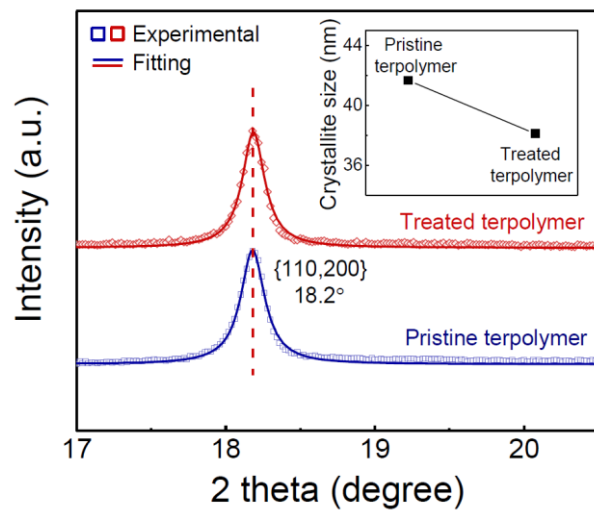

Figure S2. XRD patterns of the treated and pristine terpolymers.

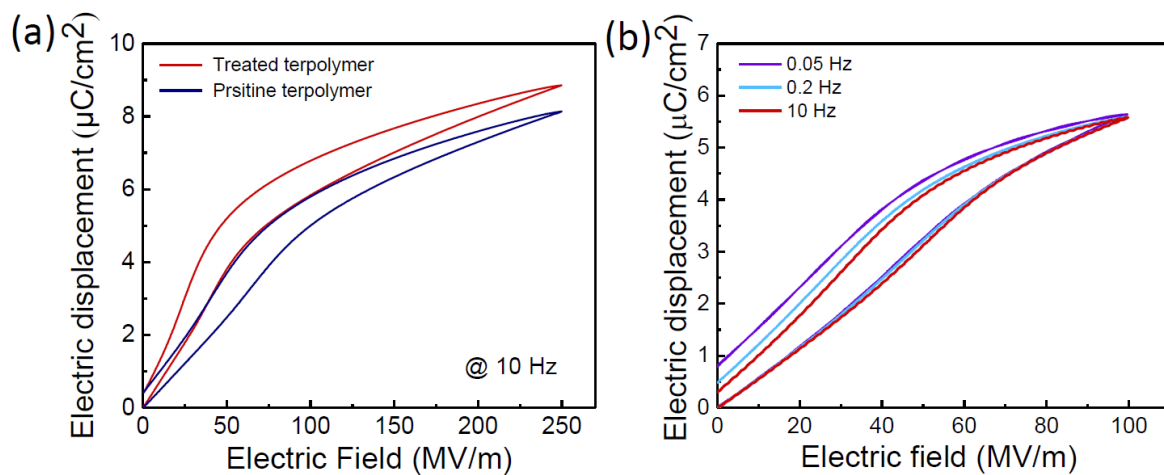

Figure S3. (a) The electric displacement-electric field ( $D$ - $E$ ) loops of the treated and pristine terpolymers; (b) the  $D$ - $E$  loops of the treated terpolymer at different frequencies.

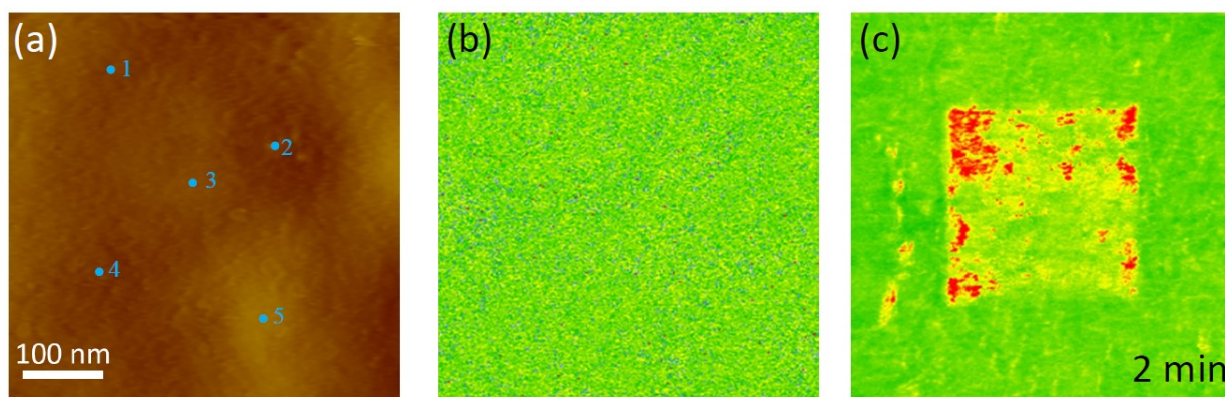

Figure S4. (a) Surface AFM image of the pristine terpolymer; (b) Phase degree pattern of initial state; (c) Phase degree pattern after poling.

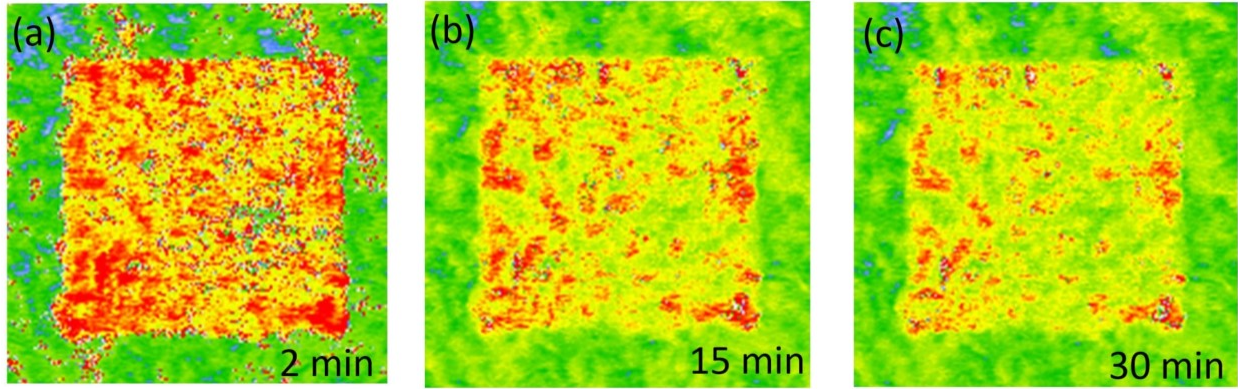

Figure S5. Relaxation behavior of the treated terpolymer.

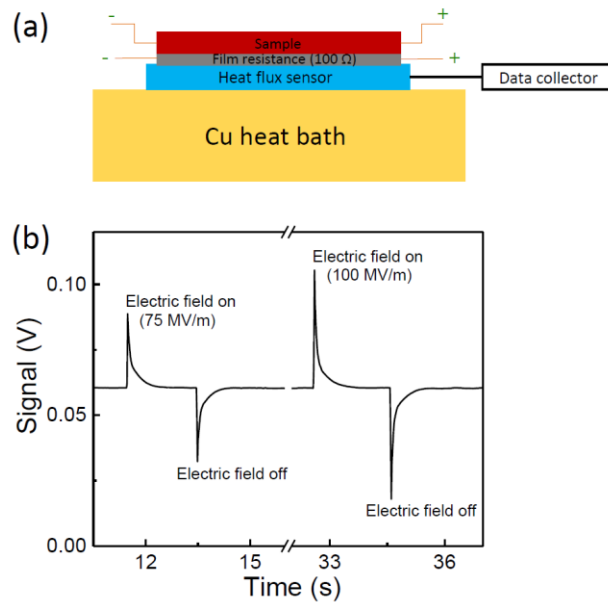

Figure S6. (a) Schematic diagrams of the EC effect measurement instrument based on a heat flux sensor and standard reference resistor; (b) an example of measured EC effect signal where signals from both electric field on (heating) and off (cooling) are illustrated.
